# Supplementary material for: Lamin A/C Is Dispensable to Mechanical Repression of Adipogenesis
Source: MDPI journal article supplement (doi:10.3390/ijms22126580), 2021-06-19
Supplement: s1 [file s1]

## Supplementary Information

### **Lamin A/C is dispensable to mechanical repression of adipogenesis**

Matthew Goelzer<sup>1</sup>, Amel Dudakovic<sup>2</sup>, Melis Olcum<sup>3, 4</sup>, Buer Sen<sup>3</sup>, Engin Ozcivici<sup>4</sup>,  
Janet Rubin<sup>3</sup>, Andre van Wijnen<sup>2</sup>, Gunes Uzer<sup>1 †</sup>

<sup>1</sup>Boise State University, <sup>2</sup>Mayo Clinic, <sup>3</sup>University of North Carolina Chapel Hill,  
<sup>4</sup>Izmir Institute of Technology

**† Corresponding Author**

**Funding support:** NIH AG059923 & P20GM109095, NSF 1929188 & 2025505 (GU), R01AR049069 (AJvW), AR075803 (JR), Career Development Award in Orthopedics Research (AD), The Scientific and Technological Research Council of Turkey 2214-A (MO).

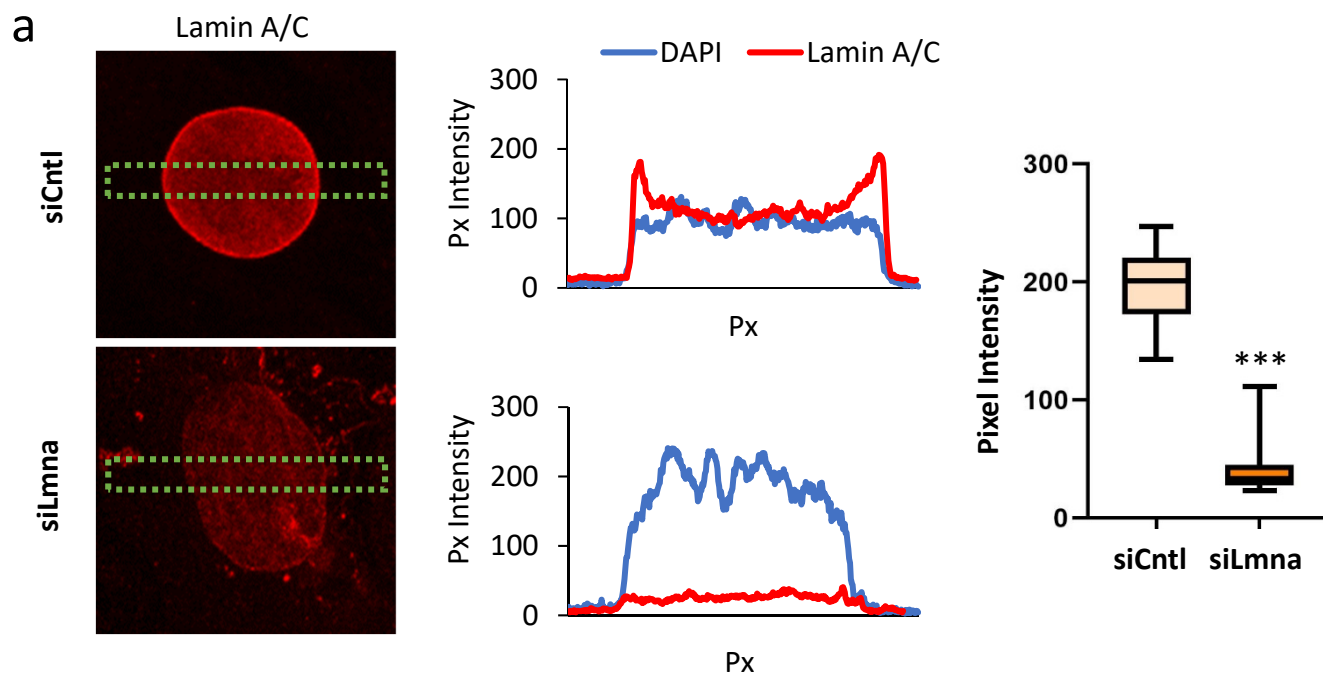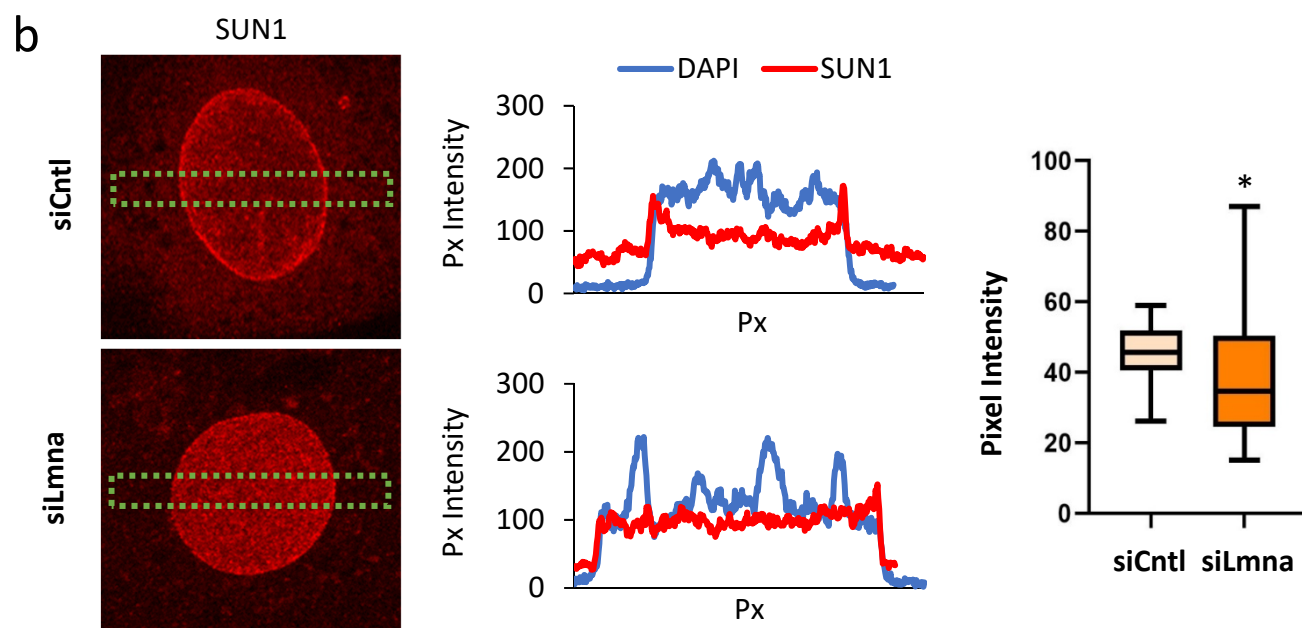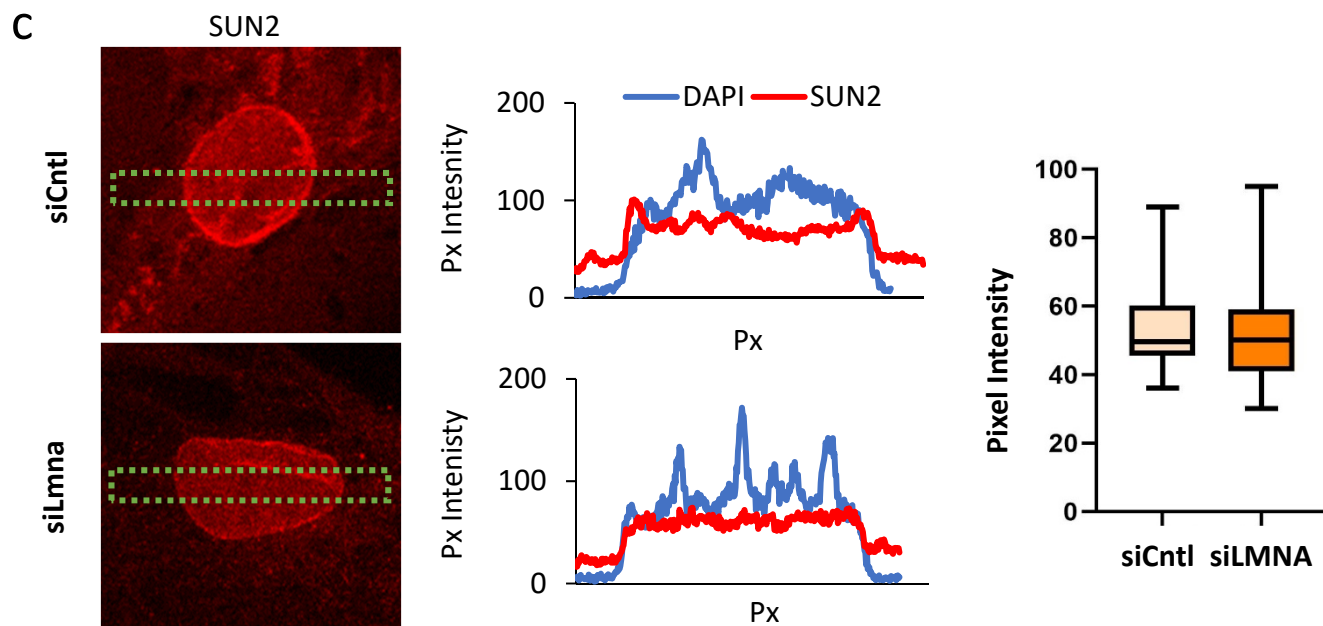

**Fig. S1 Quantification of confocal images for SUN1, SUN2 and lamin A/C in siCntl and siLmna groups.** **a** Intensity profile of lamin A/C staining along a rectangular region of interest on the nucleus. The middle plot shows the representative intensity distribution of lamin A/C over the nucleus (blue, Hoechst 33342). Lamin A/C intensity peaked at the nuclear rim in siCntl cells while no peaks were observed in siLmna cells. Comparison of peak intensity values at the nuclear envelope show 80% ( $p<0.001$ ,  $n=25/\text{grp}$ ) decrease with siLmna treatment. **b** Intensity profile of SUN1 staining along a rectangular region of interest on the nucleus. The middle plot shows the representative intensity distribution of SUN1 (red) over the nucleus (blue, Hoechst 33342). Comparison of peak intensity values at the nuclear envelope show 15% ( $p<0.05$ ,  $n=19/\text{grp}$ ) decrease with siLmna treatment. **c** Intensity profile of SUN2 staining along a rectangular region of interest on the nucleus. The middle plot shows the representative intensity distribution of SUN2 (red) over the nucleus (blue, Hoechst 33342). No difference between siCntl and siLmna was detected. Images were quantified using ImageJ. Results are presented as mean  $\pm$  SD. Group comparisons were made via non-parametric Mann Whitney U-test. \*  $p<0.05$ , \*\*  $p<0.01$ , \*\*\*  $p<0.001$ .

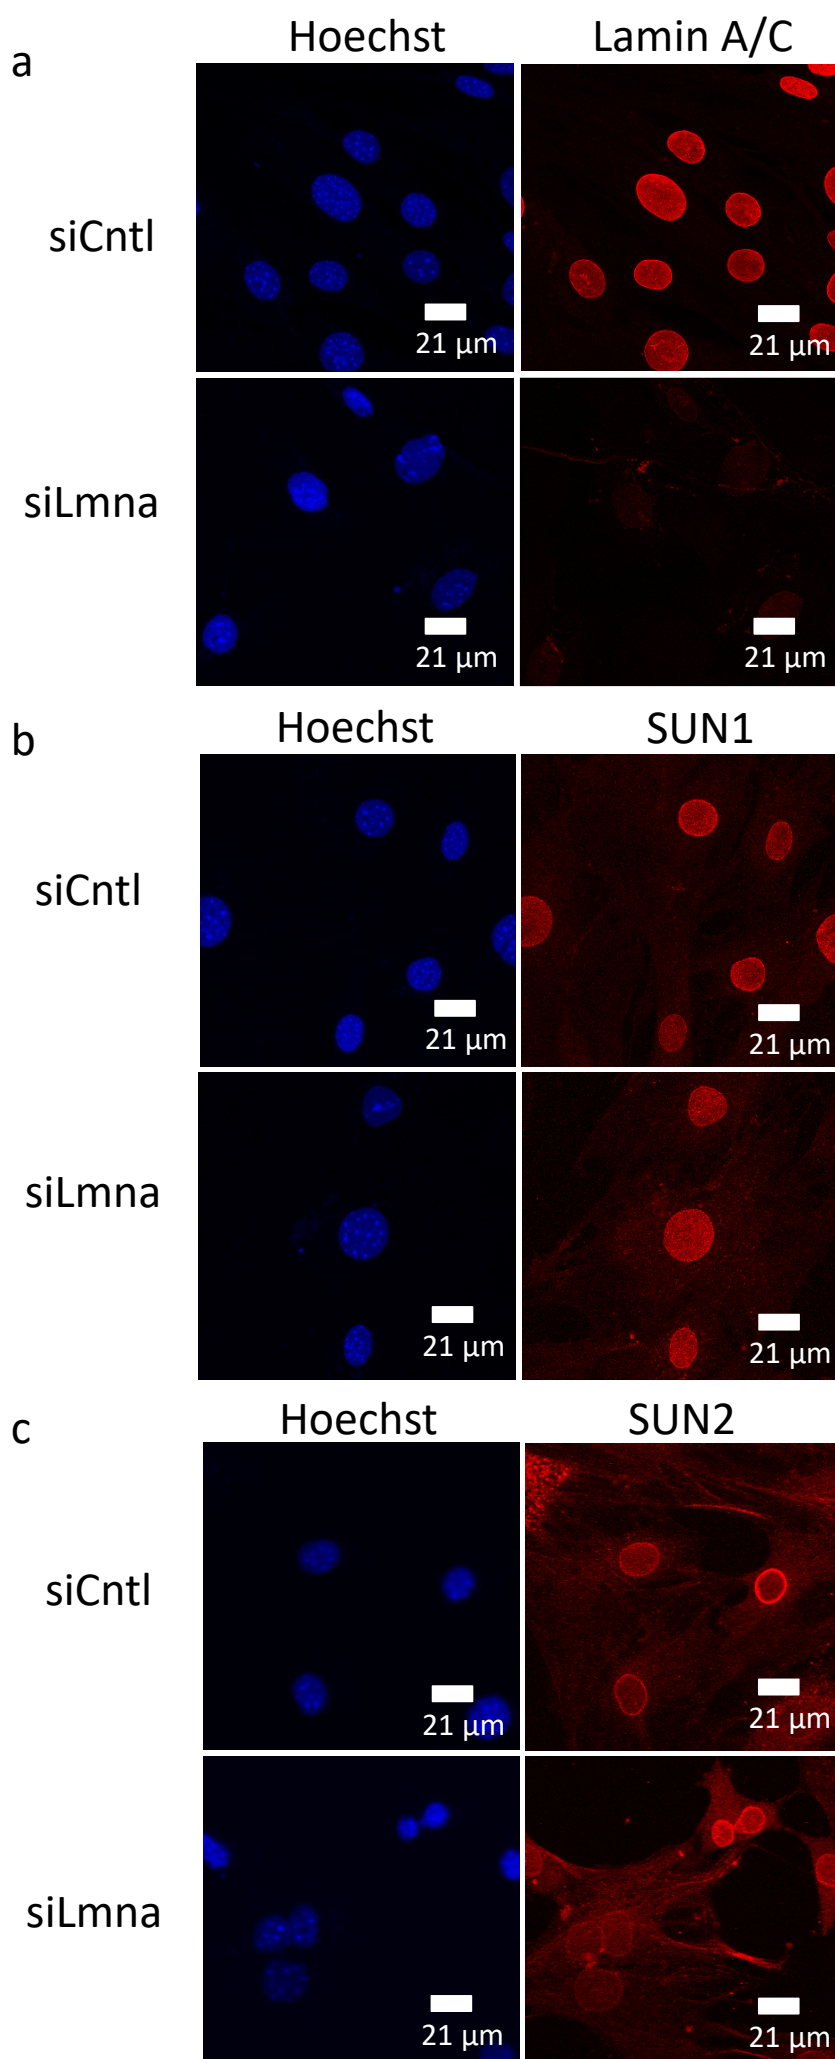

**Fig. S2 Representative photos of nuclei (blue, Hoechst 33342) for Figure 2a. a** lamin A/C (Red, 594nm) **b** SUN1 (Red, 594nm) **c** SUN2 (Red, 594nm). Scale bars: 21μm

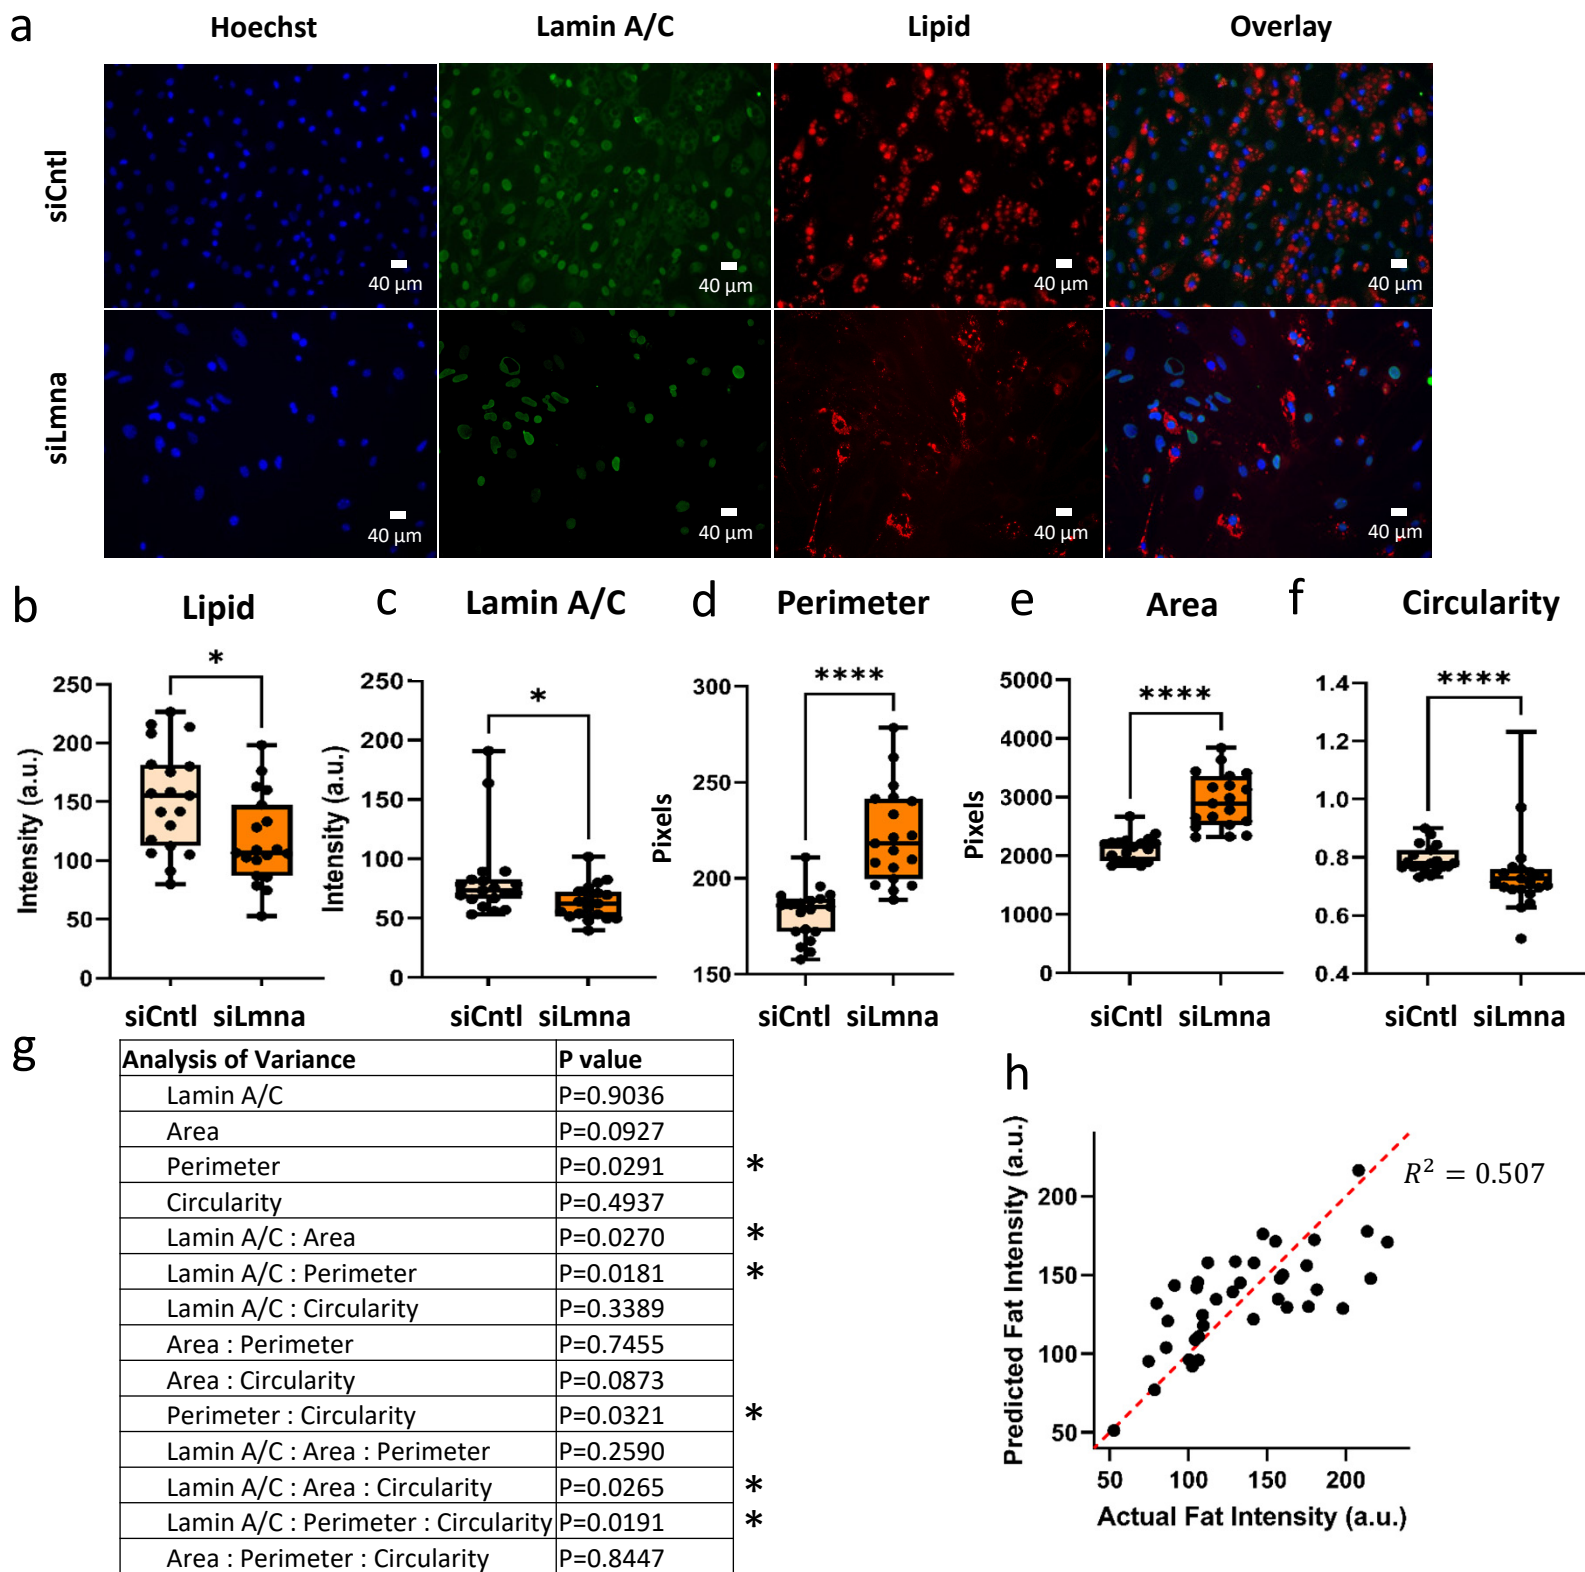

**Fig. S3 Quantification of lamin A/C, lipid levels and, cell structural parameters during adipogenesis in siCntrl and siLmna groups.** **a** Representative photos of Nuclei (blue, Hoechst 33342), lamin A/C (green, 488nm), and Lipid (Red, 610nm) staining for siCntrl and siLmna cells. Scale bars: 40μm. **b** Measurement of average pixel intensity of lipid droplets per cell. siLmna treated cells had 23% less intensity then siCntrl treated cells (n=19 , p<0.05). **c** Average intensity of Lamin A/C. siLmna treated cells had 24% less intensity then siCntrl treated cells (n=19, p<0.05). **d** Average perimeter of nuclei measured in pixels per image. siLmna cells had 32% greater perimeter then siCntrl cells (n=19, p<0.0001). **e** Average nuclei per area per image as measured in pixels. siLmna cells had 38% greater area than siCntrl cells (n=19, p<0.0001). Average circularity per image. siLmna cells had a 11% decrease in circularity compared to siCntrl cells (n=19, p<0.0001). **g** Anova analysis of parameters for multiple linear regression model. Perimeter, Lamin A/C: Area, Lamin A/C: Perimeter, Lamin A/C: Area: Circularity, and Lamin A/C Circularity : Perimeter comparisons were found to be significant (p<0.05). **h** Multiple linear regression model with main affects, two-way, and three-way interactions predicting average lipid droplet intensity per cell ( $R^2 = 0.507$ ). \* p<0.05, \*\* p<0.01, \*\*\* p<0.001.





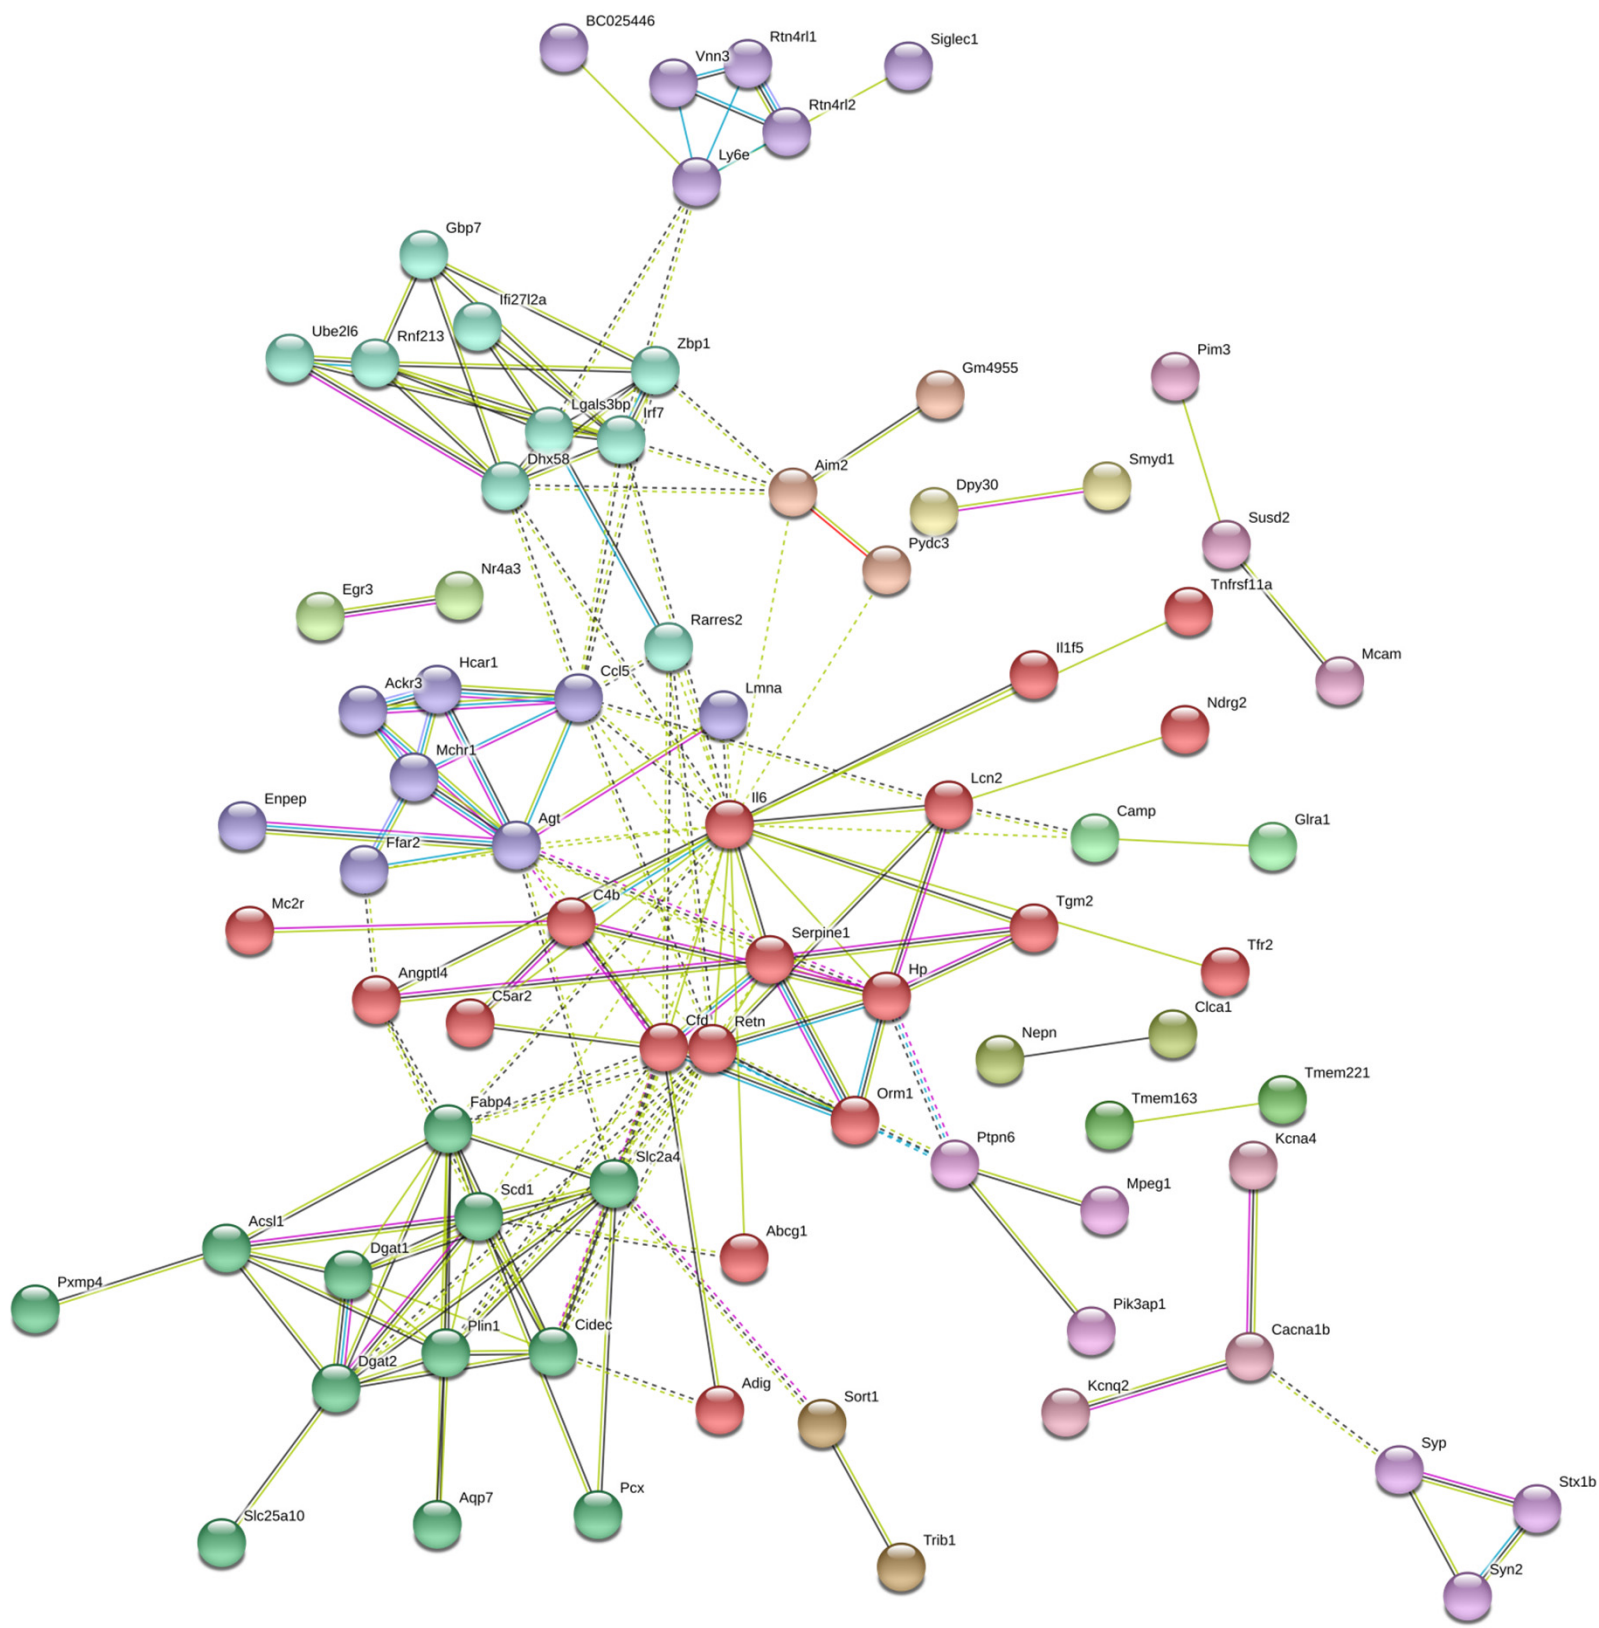

**Fig. S5** Full size, annotated gene cluster for Fig.6d

Fig. S4

a

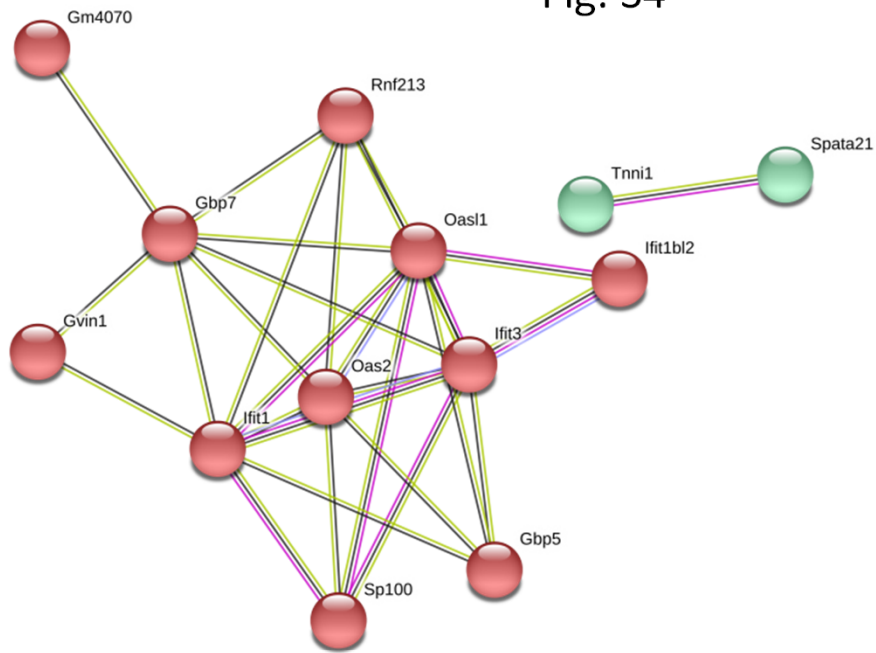

b

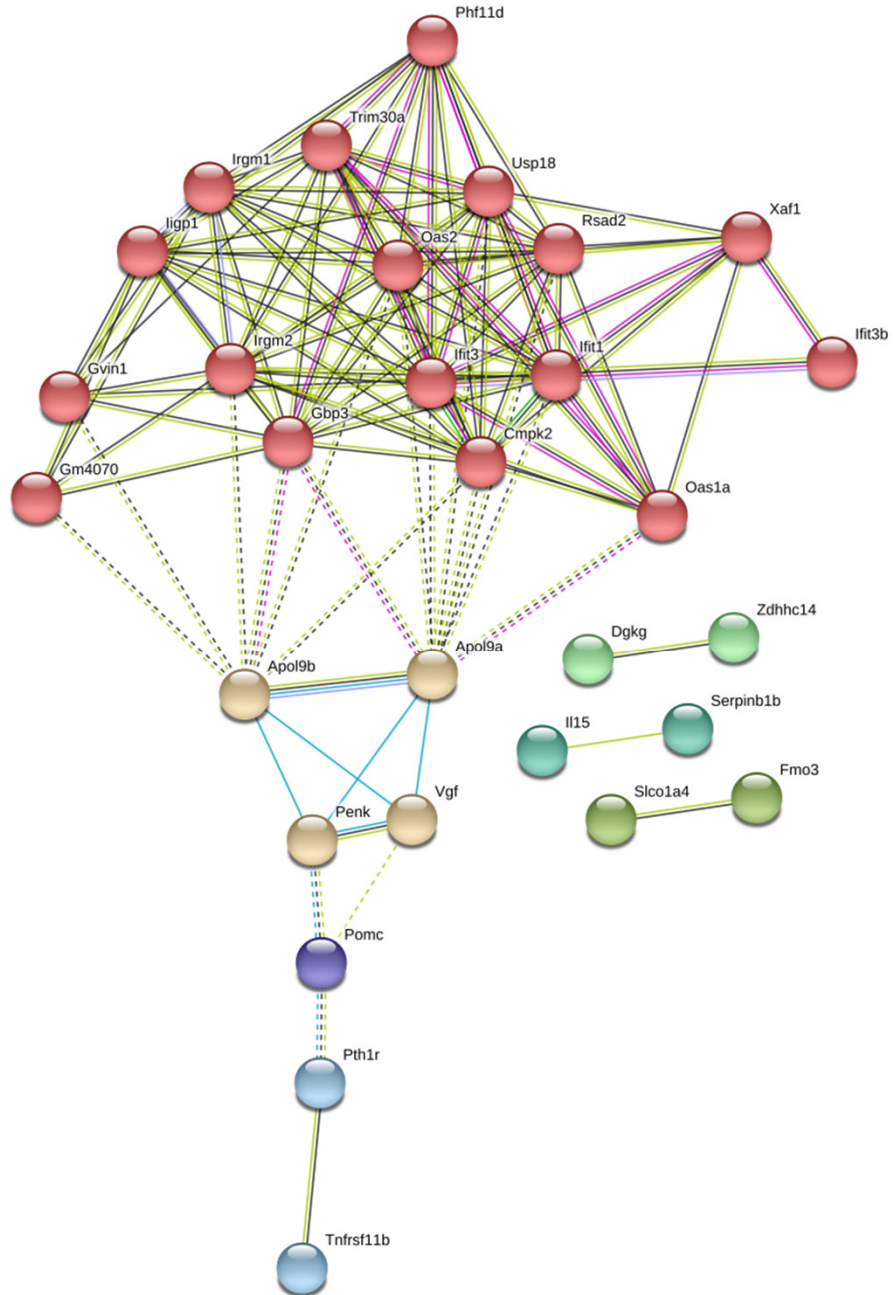

Fig. S6 Full size, annotated gene cluster for a Fig.7c and b Fig.7d



a

| Tissue repair                                           |
|---------------------------------------------------------|
| Aqp1<br>Vwf<br>Tnfrsf11b<br>Mmp3<br>Dcn<br>Cd34<br>Fmod |
| ECM remodeling & cell surface transporters              |
| slco1a6<br>Prl2c2<br>Prl2c3<br>Abcb1a<br>slco1a4        |

b

| Cell adhesion & cytoskeletal organization                        |                                                                     |
|------------------------------------------------------------------|---------------------------------------------------------------------|
| Bc025446<br>Vnn3<br>Ly6e                                         | Rtn4rl1<br>Rtn4rl2<br>Siglec1                                       |
| Interferon signaling & regulation of gene expression             |                                                                     |
| Ube2l6<br>Rnf213<br>Gbp7<br>Ifi27l2a                             | Zbp1<br>Irf7<br>Lgals3bp<br>dhx58                                   |
| G protein coupled receptor signaling                             |                                                                     |
| Hcar1<br>Ackr3<br>Ccl5<br>Mchr1                                  | Enpep<br>Ffar2<br>Agt<br>Lmna                                       |
| Lipid metabolism & inflammatory signaling                        |                                                                     |
| Tnfrsf11a<br>Il1f5<br>Ndr2<br>Lcn2<br>Tfr2<br>Tgm2<br>Hp<br>Orm1 | Serpine1<br>Retn<br>Abcg1<br>Cfd<br>Angptl4<br>C4b<br>C5ar2<br>Mc2r |
| Adipogenesis                                                     |                                                                     |
| Fabp4<br>Slc2a4<br>Scd1<br>Dgat1<br>Plin1<br>cidec               | Pcx<br>aqp7<br>Slc25a10<br>Acsl1<br>Pxmp4                           |

**Fig. S7** Gene lists for **a** Fig.6b and **b** Fig.6c

Sun-1

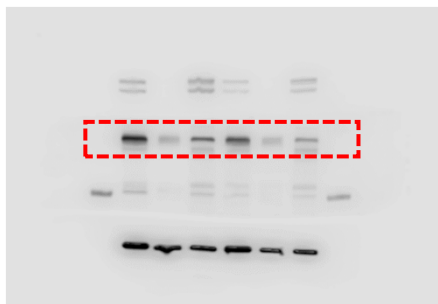

Sun-2

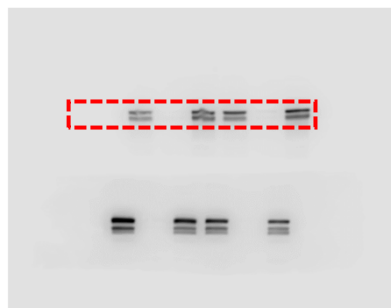

LDHA

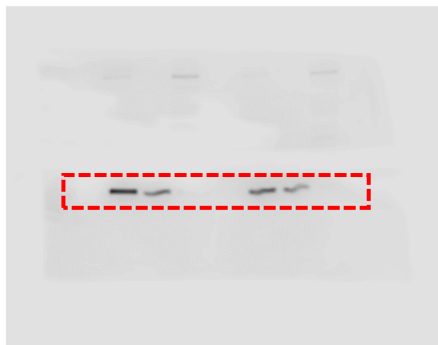

FAK

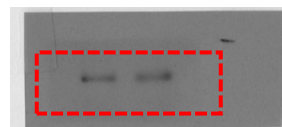

Akt

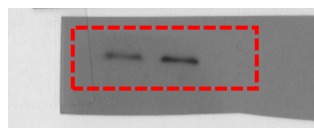

PARP

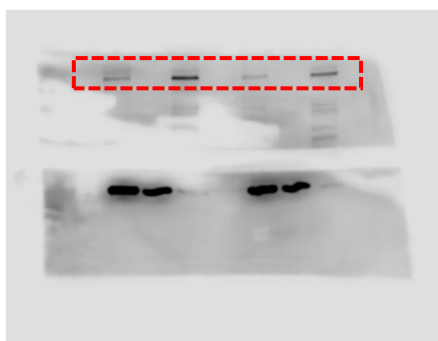

Vinculin

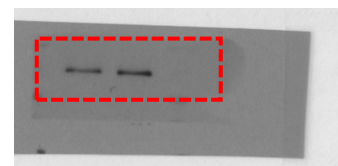

Lamin A/C

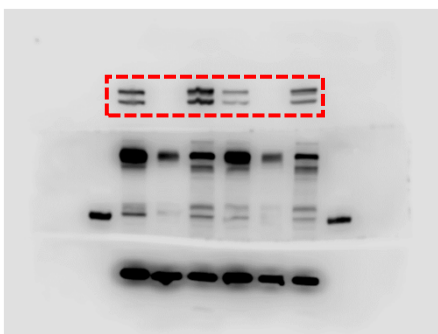

**Figure S8.** Unprocessed blots used in Figure 2 as obtained by LiCor C-DiGit blot scanner.

Strain

pFAK

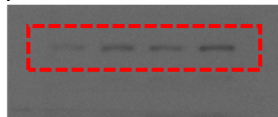

TFAK

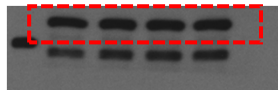

Lamin A/C

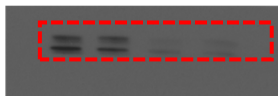

LIV

pFAK

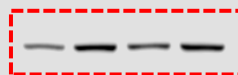

TFAK

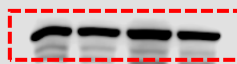

Lamin A/C

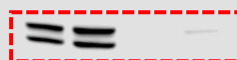

**Figure S9.** Unprocessed blots used in Figure 3 as obtained by LiCor C-DiGit blot scanner.

$\beta$ -tubulin

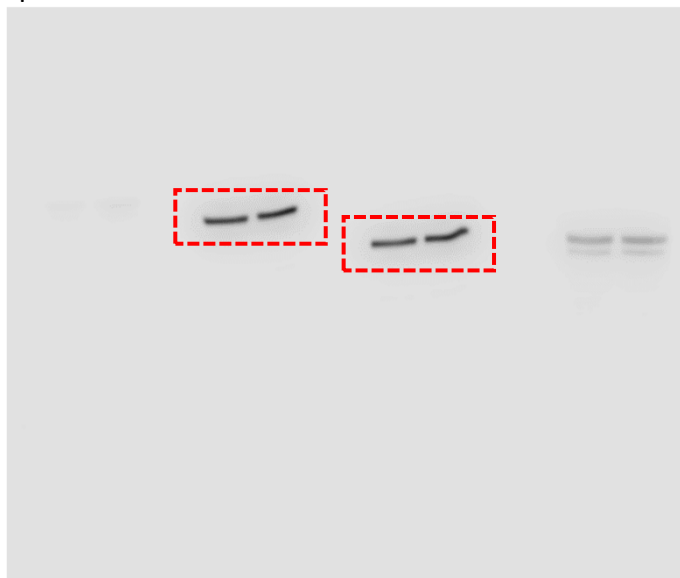

Lamin A/C

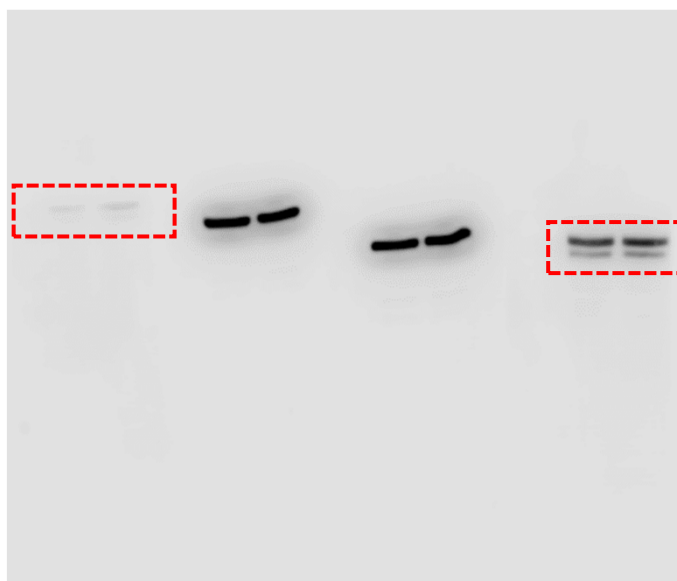

APN

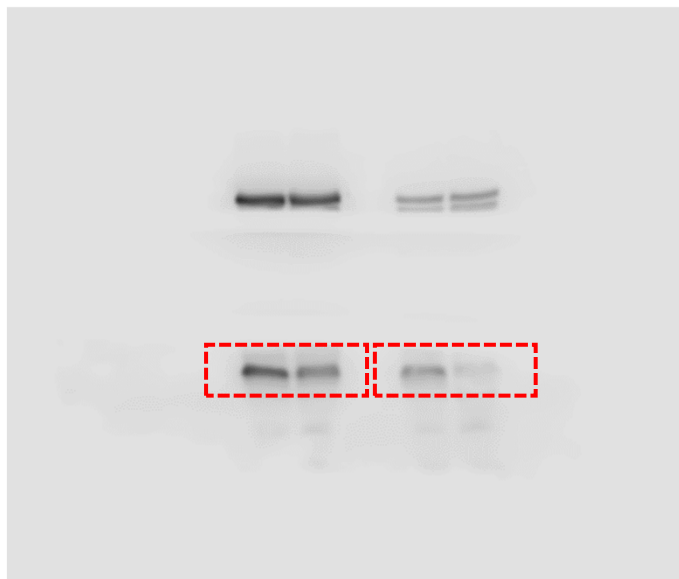

**Figure S10.** Unprocessed blots used in Figure 4 as obtained by LiCor C-DiGit blot scanner.

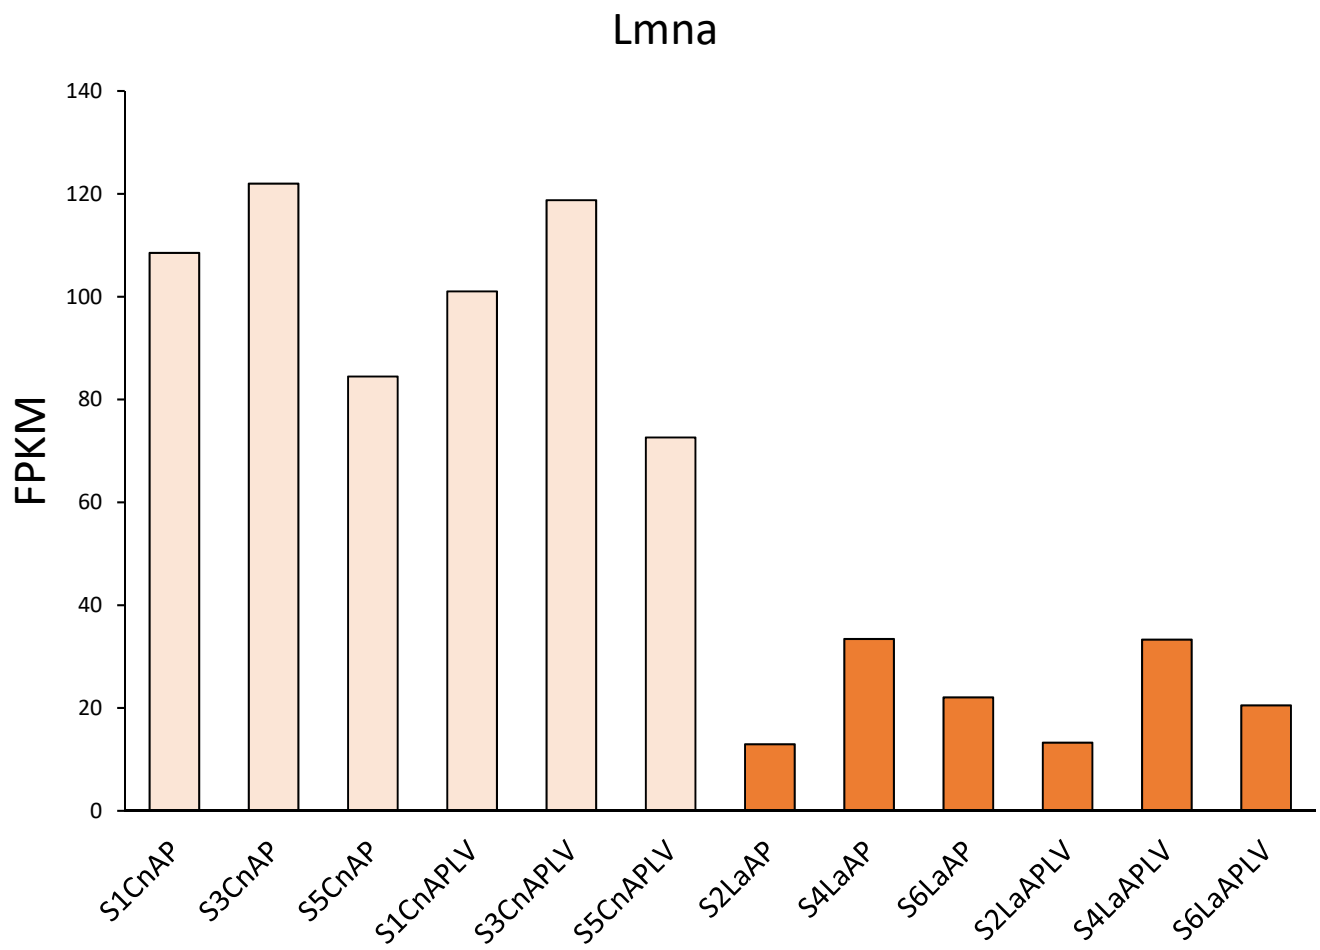

**Fig. S11.** Lmna FPKM levels for RNA-seq samples.



**Table S1:** Table of biological and cellular pathways with an FDR < 0.05 detected in STRING analysis from Fig. 6b.

| #term ID   | term description                                 | strength | false discovery rate |
|------------|--------------------------------------------------|----------|----------------------|
| GO:0005576 | extracellular region                             | 0.45     | 5.96E-06             |
| GO:0005886 | plasma membrane                                  | 0.24     | 0.0097               |
| GO:0005615 | extracellular space                              | 0.41     | 0.0169               |
| GO:0030054 | cell junction                                    | 0.43     | 0.0169               |
| GO:0031527 | filopodium membrane                              | 1.46     | 0.0169               |
| GO:0042383 | sarcolemma                                       | 0.82     | 0.0169               |
| GO:0098590 | plasma membrane region                           | 0.4      | 0.0208               |
| GO:0005887 | integral component of plasma membrane            | 0.37     | 0.0462               |
| GO:0016324 | apical plasma membrane                           | 0.59     | 0.0462               |
| GO:0032501 | multicellular organismal process                 | 0.23     | 0.0084               |
| GO:0042060 | wound healing                                    | 0.77     | 0.0084               |
| GO:0003008 | system process                                   | 0.39     | 0.0278               |
| GO:0022603 | regulation of anatomical structure morphogenesis | 0.46     | 0.0278               |
| GO:0032502 | developmental process                            | 0.21     | 0.0278               |
| GO:0032879 | regulation of localization                       | 0.31     | 0.0278               |
| GO:0048856 | anatomical structure development                 | 0.23     | 0.0278               |
| GO:0050878 | regulation of body fluid levels                  | 0.71     | 0.0278               |
| GO:0050896 | response to stimulus                             | 0.18     | 0.0278               |
| GO:0007275 | multicellular organism development               | 0.22     | 0.0308               |
| GO:0048731 | system development                               | 0.24     | 0.0308               |
| GO:0007586 | digestion                                        | 0.99     | 0.0419               |

**Table S2:** Table of top 72 biological and cellular pathways with an FDR < 0.05 detected in STRING analysis from Fig. 6d.

| #term ID   | term description                                     | strength | false discovery rate |
|------------|------------------------------------------------------|----------|----------------------|
| GO:0010646 | regulation of cell communication                     | 0.4      | 2.14E-06             |
| GO:0023051 | regulation of signaling                              | 0.39     | 2.14E-06             |
| GO:0048583 | regulation of response to stimulus                   | 0.34     | 4.37E-05             |
| GO:0065007 | biological regulation                                | 0.18     | 4.37E-05             |
| GO:0050789 | regulation of biological process                     | 0.18     | 5.29E-05             |
| GO:0031349 | positive regulation of defense response              | 0.86     | 7.66E-05             |
| GO:0050794 | regulation of cellular process                       | 0.19     | 7.66E-05             |
| GO:0006952 | defense response                                     | 0.54     | 8.60E-05             |
| GO:0009966 | regulation of signal transduction                    | 0.36     | 8.60E-05             |
| GO:0071345 | cellular response to cytokine stimulus               | 0.64     | 8.60E-05             |
| GO:0006955 | immune response                                      | 0.55     | 0.00015              |
| GO:0007154 | cell communication                                   | 0.3      | 0.00015              |
| GO:0009605 | response to external stimulus                        | 0.41     | 0.00015              |
| GO:0010648 | negative regulation of cell communication            | 0.49     | 0.00015              |
| GO:0023052 | signaling                                            | 0.3      | 0.00015              |
| GO:0023057 | negative regulation of signaling                     | 0.49     | 0.00015              |
| GO:0045444 | fat cell differentiation                             | 1.05     | 0.00015              |
| GO:0048518 | positive regulation of biological process            | 0.25     | 0.00015              |
| GO:0050896 | response to stimulus                                 | 0.22     | 0.00015              |
| GO:0051707 | response to other organism                           | 0.53     | 0.00015              |
| GO:0098542 | defense response to other organism                   | 0.6      | 0.00015              |
| GO:0032103 | positive regulation of response to external stimulus | 0.72     | 0.00021              |
| GO:0048584 | positive regulation of response to stimulus          | 0.4      | 0.00023              |
| GO:0009968 | negative regulation of signal transduction           | 0.49     | 0.00027              |
| GO:0048519 | negative regulation of biological process            | 0.26     | 0.00039              |
| GO:0050873 | brown fat cell differentiation                       | 1.38     | 0.00039              |
| GO:0007166 | cell surface receptor signaling pathway              | 0.42     | 0.00042              |
| GO:0019221 | cytokine-mediated signaling pathway                  | 0.76     | 0.00048              |
| GO:0032879 | regulation of localization                           | 0.34     | 0.00048              |
| GO:0048585 | negative regulation of response to stimulus          | 0.43     | 0.00048              |
| GO:0006954 | inflammatory response                                | 0.67     | 0.00052              |
| GO:0002684 | positive regulation of immune system process         | 0.55     | 0.00056              |
| GO:0019216 | regulation of lipid metabolic process                | 0.73     | 0.00066              |
| GO:0070887 | cellular response to chemical stimulus               | 0.36     | 0.00066              |
| GO:0045834 | positive regulation of lipid metabolic process       | 0.91     | 0.00068              |
| GO:0071356 | cellular response to tumor necrosis factor           | 0.91     | 0.0007               |

|            |                                                         |      |         |
|------------|---------------------------------------------------------|------|---------|
| GO:0048660 | regulation of smooth muscle cell proliferation          | 0.91 | 0.00071 |
| GO:0050729 | positive regulation of inflammatory response            | 0.99 | 0.00077 |
| GO:0051049 | regulation of transport                                 | 0.39 | 0.00085 |
| GO:0032101 | regulation of response to external stimulus             | 0.53 | 0.00086 |
| GO:0006810 | transport                                               | 0.3  | 0.001   |
| GO:0051716 | cellular response to stimulus                           | 0.23 | 0.001   |
| GO:0010647 | positive regulation of cell communication               | 0.4  | 0.0011  |
| GO:0007267 | cell-cell signaling                                     | 0.54 | 0.0012  |
| GO:0014910 | regulation of smooth muscle cell migration              | 1.06 | 0.0012  |
| GO:0023056 | positive regulation of signaling                        | 0.4  | 0.0012  |
| GO:0050778 | positive regulation of immune response                  | 0.65 | 0.0012  |
| GO:0071310 | cellular response to organic substance                  | 0.37 | 0.0014  |
| GO:0048522 | positive regulation of cellular process                 | 0.23 | 0.0015  |
| GO:0010033 | response to organic substance                           | 0.32 | 0.0016  |
| GO:0032940 | secretion by cell                                       | 0.67 | 0.0017  |
| GO:0045087 | innate immune response                                  | 0.6  | 0.0017  |
| GO:0031347 | regulation of defense response                          | 0.59 | 0.0018  |
| GO:0048523 | negative regulation of cellular process                 | 0.24 | 0.0018  |
| GO:0044092 | negative regulation of molecular function               | 0.46 | 0.002   |
| GO:0002675 | positive regulation of acute inflammatory response      | 1.35 | 0.0023  |
| GO:0035336 | long-chain fatty-acyl-CoA metabolic process             | 1.69 | 0.0028  |
| GO:0006950 | response to stress                                      | 0.29 | 0.0029  |
| GO:0048661 | positive regulation of smooth muscle cell proliferation | 0.97 | 0.0029  |
| GO:0042221 | response to chemical                                    | 0.26 | 0.003   |
| GO:0051179 | localization                                            | 0.24 | 0.003   |
| GO:0010872 | regulation of cholesterol esterification                | 1.65 | 0.0033  |
| GO:0023061 | signal release                                          | 0.85 | 0.0034  |
| GO:0002253 | activation of immune response                           | 0.77 | 0.0036  |
| GO:0009615 | response to virus                                       | 0.77 | 0.0036  |
| GO:0070555 | response to interleukin-1                               | 0.93 | 0.004   |
| GO:0001932 | regulation of protein phosphorylation                   | 0.4  | 0.0042  |
| GO:0010817 | regulation of hormone levels                            | 0.57 | 0.0045  |
| GO:0060259 | regulation of feeding behavior                          | 1.24 | 0.0045  |
| GO:0080134 | regulation of response to stress                        | 0.42 | 0.0045  |
| GO:0002376 | immune system process                                   | 0.36 | 0.0047  |
| GO:0050727 | regulation of inflammatory response                     | 0.69 | 0.0047  |

**Table S3:** Table of biological and cellular pathways with an FDR < 0.05 detected in STRING analysis from Fig. 7c.

| #term ID   | term description                      | strength | false discovery rate |
|------------|---------------------------------------|----------|----------------------|
| GO:0051607 | defense response to virus             | 1.48     | 0.00032              |
| GO:0035458 | cellular response to interferon-beta  | 1.98     | 0.00096              |
| GO:0009617 | response to bacterium                 | 0.99     | 0.0026               |
| GO:0035457 | cellular response to interferon-alpha | 2.19     | 0.0067               |
| GO:0051707 | response to other organism            | 0.79     | 0.0067               |
| GO:0098542 | defense response to other organism    | 0.88     | 0.0067               |
| GO:0045087 | innate immune response                | 0.93     | 0.0101               |
| GO:0006955 | immune response                       | 0.78     | 0.0127               |
| GO:0035634 | response to stilbenoid                | 1.88     | 0.0127               |
| GO:0009605 | response to external stimulus         | 0.56     | 0.0278               |

**Table S4:** Table of biological and cellular pathways with an FDR < 0.05 detected in STRING analysis from Fig. 7d.

| #term ID   | term description                       | strength | false discovery rate |
|------------|----------------------------------------|----------|----------------------|
| GO:0035456 | response to interferon-beta            | 1.81     | 1.22E-06             |
| GO:0009617 | response to bacterium                  | 0.93     | 8.63E-06             |
| GO:0035458 | cellular response to interferon-beta   | 1.84     | 8.63E-06             |
| GO:0051704 | multi-organism process                 | 0.56     | 6.78E-05             |
| GO:0051707 | response to other organism             | 0.73     | 6.78E-05             |
| GO:0009605 | response to external stimulus          | 0.55     | 0.00017              |
| GO:0009615 | response to virus                      | 1.1      | 0.0002               |
| GO:0051607 | defense response to virus              | 1.2      | 0.00032              |
| GO:0045087 | innate immune response                 | 0.83     | 0.00078              |
| GO:0006952 | defense response                       | 0.65     | 0.0012               |
| GO:0006955 | immune response                        | 0.68     | 0.0013               |
| GO:0034097 | response to cytokine                   | 0.7      | 0.0021               |
| GO:0071345 | cellular response to cytokine stimulus | 0.73     | 0.0036               |
| GO:0002252 | immune effector process                | 0.85     | 0.0045               |
| GO:0002376 | immune system process                  | 0.49     | 0.0157               |
| GO:0035457 | cellular response to interferon-alpha  | 1.82     | 0.0343               |
| GO:0071310 | cellular response to organic substance | 0.45     | 0.0343               |
| GO:0071305 | cellular response to vitamin D         | 1.79     | 0.0358               |



**Table S5:** Cell culture and pharmacological reagents and their final concentrations

| Cell Culture and Pharmacological Reagents |                      | Final Concentration |
|-------------------------------------------|----------------------|---------------------|
| IMDM                                      | GIBCO                | -                   |
| DMEM                                      | Caisson Laboratories | -                   |
| FCS                                       | Atlanta Biologicals  | 10% v/v             |
| Penicillin/streptomycin                   | GIBCO                | 1% v/v              |
| Dexamethasone                             | Sigma Aldrich        | 0.1uM               |
| Insulin                                   | Sigma Aldrich        | 5 µg/mL             |

**Table S6:** Antibodies used and their final concentrations for western blots.

| Antibodies                      |                           | Final Concentration |
|---------------------------------|---------------------------|---------------------|
| p-FAK Tyr397 (3283)             | Cell Signaling            | 1/1000              |
| FAK (sc-558)                    | Santa Cruz Biotechnology  | 1/500               |
| LDHA (2012S)                    | Cell Signaling Technology | 1/1000              |
| Vinculin (E1E9V)                | Cell Signaling Technology | 1/1000              |
| PARP (9542S)                    | Cell Signaling Technology | 1/1000              |
| Lamin A/C (sc-7292)             | Santa Cruz Biotechnology  | 1/1000              |
| Sun-1 (HPA008346)               | Sigma Aldrich             | 1/1000              |
| Sun-2 (ab87036)                 | Abcam                     | 1/1000              |
| Adiponectin (ADIPOQ ) (PA1-054) | ThermoFischer Scientific  | 1/1000              |
| $\beta$ -Tubulin (D3U1W)        | Cell Signaling Technology | 1/1000              |

**Table S7:** Immunostaining antibodies and reagents and their final concentrations.

| Immunostaining antibodies and Reagents |                          | Final Concentration |
|----------------------------------------|--------------------------|---------------------|
| Hoechst 33342                          | Thermo Scientific        | 1 µg/mL             |
| Alexa Fluor 488 Phalloidin             | Life Technologies        | 0.1µM               |
| Lamin A/C (sc-7292)                    | Santa Cruz Biotechnology | 1:300               |
| Sun-1 (MABT892)                        | EMD Millipore            | 1:300               |
| Sun-2 (IQ444)                          | Immuquest                | 1:300               |
